# Supplementary material for: Pyridine nucleotide redox potential in coronary smooth muscle couples myocardial blood flow to cardiac metabolism
Source: PubMed Central journal article supplement (PMC9018695; doi:10.1038/s41467-022-29745-z), 2022-04-19
Supplement: 41467_2022_29745_MOESM1_ESM.pdf [file 41467_2022_29745_MOESM1_ESM.pdf]

## **Supplementary Information**

### **Pyridine nucleotide redox potential in coronary smooth muscle couples myocardial blood flow to cardiac metabolism**

Marc M. Dwenger<sup>1</sup>, Sean M. Raph<sup>1</sup>, Michelle L. Reyzer<sup>2</sup>, M. Lisa Manier<sup>2</sup>, Daniel W. Riggs<sup>1</sup>, Zachary B. Wohl<sup>1</sup>, Vahagn Ohanyan<sup>3</sup>, Gregory Mack,<sup>3</sup> Thomas Pucci,<sup>3</sup> Joseph B. Moore<sup>1</sup>, Bradford G. Hill<sup>1</sup>, William M. Chilian<sup>3</sup>, Richard M. Caprioli<sup>2</sup>, Aruni Bhatnagar<sup>1</sup>, Matthew A. Nystoriak<sup>1</sup>

<sup>1</sup>Department of Medicine, Division of Environmental Medicine, Diabetes and Obesity Center, University of Louisville, Louisville, KY 40202 USA; <sup>2</sup>Department of Biochemistry, Vanderbilt University School of Medicine, Nashville, Tennessee 37235 USA; <sup>3</sup>Department of Integrative Medical Sciences, Northeast Ohio Medical University, Rootstown Ohio 44272 USA.

## Supplementary Figures and Tables

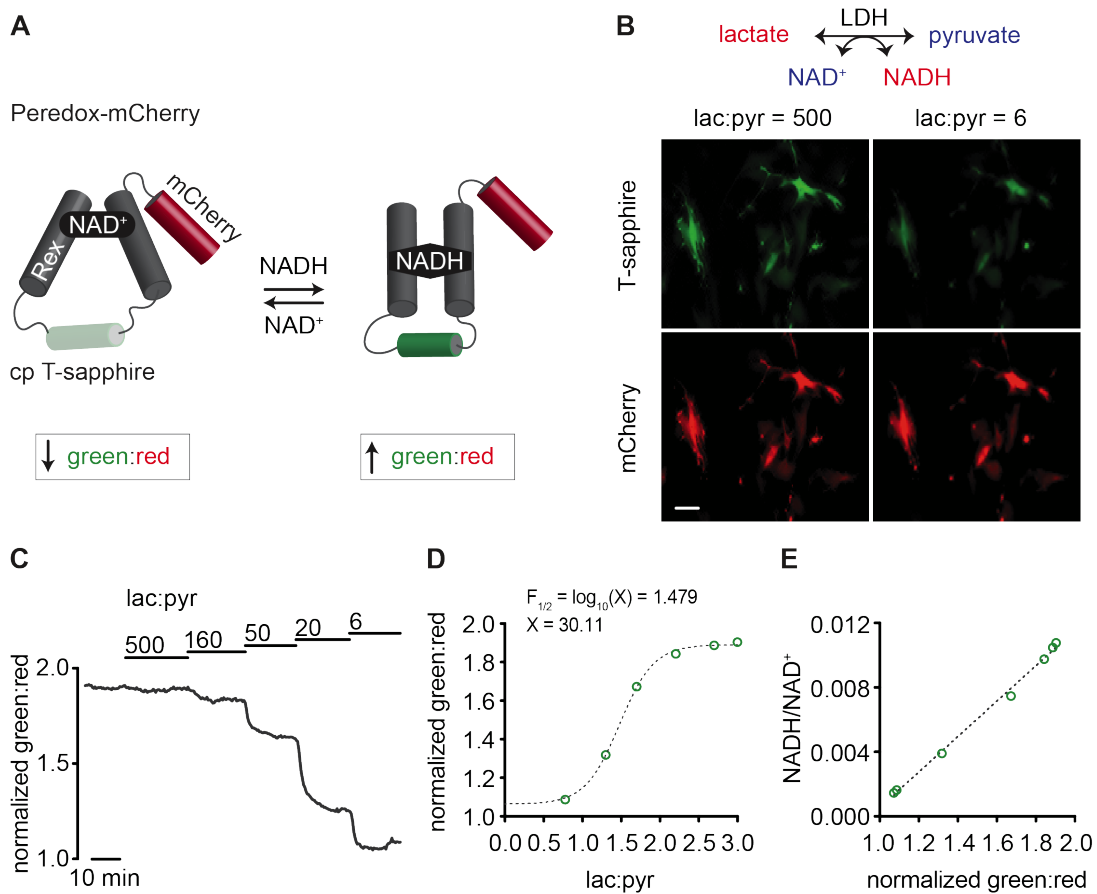

**Supplementary Figure 1: Measurement of cytosolic NADH:NAD<sup>+</sup> in arterial smooth muscle cells. (A)** Schematic representation of peredox-mCherry NADH:NAD<sup>+</sup>-sensitive fluorescent biosensor. Peredox-mCherry is a modified bacterial redox-sensitive transcriptional repressor (i.e., Rex) that consists of circularly permuted T-sapphire and mCherry (see ref <sup>1</sup>). Upon binding of NADH, T-sapphire fluorescence is enhanced. No change in fluorescence is observed with mCherry, enabling normalization to biosensor expression via red fluorescence. **(B)** Representative fluorescence images showing T-sapphire and mCherry fluorescence in aortic vascular smooth muscle cells expressing peredox-mCherry in the presence of external lactate:pyruvate (lac:pyr) of 500 or 6. Scale bar represents 50  $\mu\text{m}$ . Experiment was repeated three times with similar results. **(C-E)** Green:red fluorescence intensities (normalized to minimum ratio obtained in 10 mM pyruvate) in the presence of lac:pyr of 500-6 (C), mean green:red over the tested range of lac:pyr ratios (log scale), and mean cytosolic NADH:NAD<sup>+</sup> vs. green:red fluorescence, estimated using the protocol described in <sup>2</sup>. n = 87 cells, 3 independent experiments.

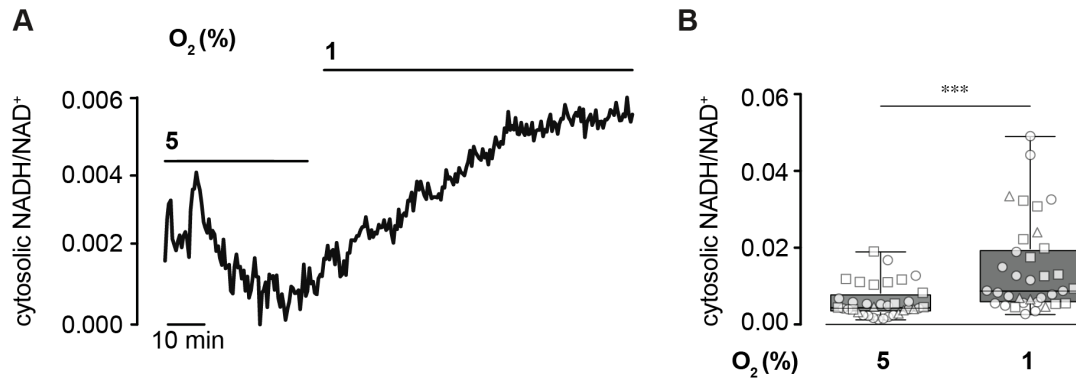

**Supplementary Figure 2: Increased NADH:NAD<sup>+</sup> in arterial smooth muscle cells in the presence of low O<sub>2</sub>.** (A) Representative recording of cytosolic NADH:NAD<sup>+</sup> in an arterial myocyte in the presence of 5% and 1% O<sub>2</sub>. NADH:NAD<sup>+</sup> in the presence of 10 mM lactate and 10 mM pyruvate, measured at the end of the experiment, were 0.0043 and 0.0015, respectively. (B) Box and whiskers plot (line: median, box: 25<sup>th</sup> to 75<sup>th</sup> percentile, whiskers: min and max) showing summarized NADH:NAD<sup>+</sup> in arterial myocytes in the presence of 5% and 1% O<sub>2</sub>. n = 35 cells, 3 independent experiments (denoted by symbols). \*\*\*p = 4.65 x 10<sup>-8</sup> (two-sided Wilcoxon matched pairs signed rank test).

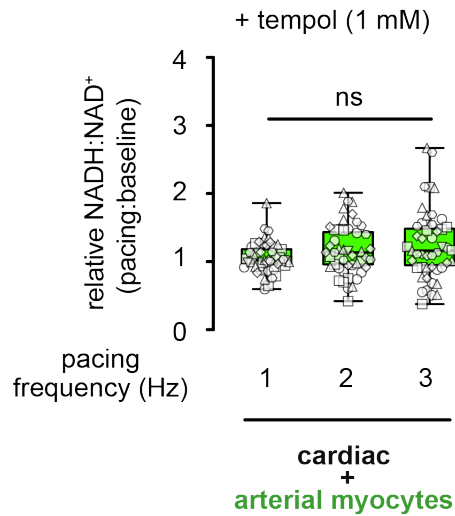

**Supplementary Figure 3: Frequency-dependent increases in arterial myocyte NADH:NAD<sup>+</sup> are blunted in the presence of tempol.** Box and whiskers plots (line: median, box: 25<sup>th</sup> to 75<sup>th</sup> percentile, whiskers: min and max) summarizing fold-change in NADH:NAD<sup>+</sup> in arterial myocytes in arterial/cardiac myocyte co-cultures electrically paced in the presence of 1 mM 4-hydroxy TEMPO (tempol). N = 47 cells from 6 independent experiments (denoted by symbols). Ns: p = 0.0864; arterial/cardiac myocyte vs. arterial/cardiac myocyte + tempol: 1 Hz, p = 0.005, 2 Hz, p = 0.033, 3 Hz, p = 0.029. Linear mixed models were used to analyze differences in log-transformed NADH:NAD<sup>+</sup> across frequencies and between groups.

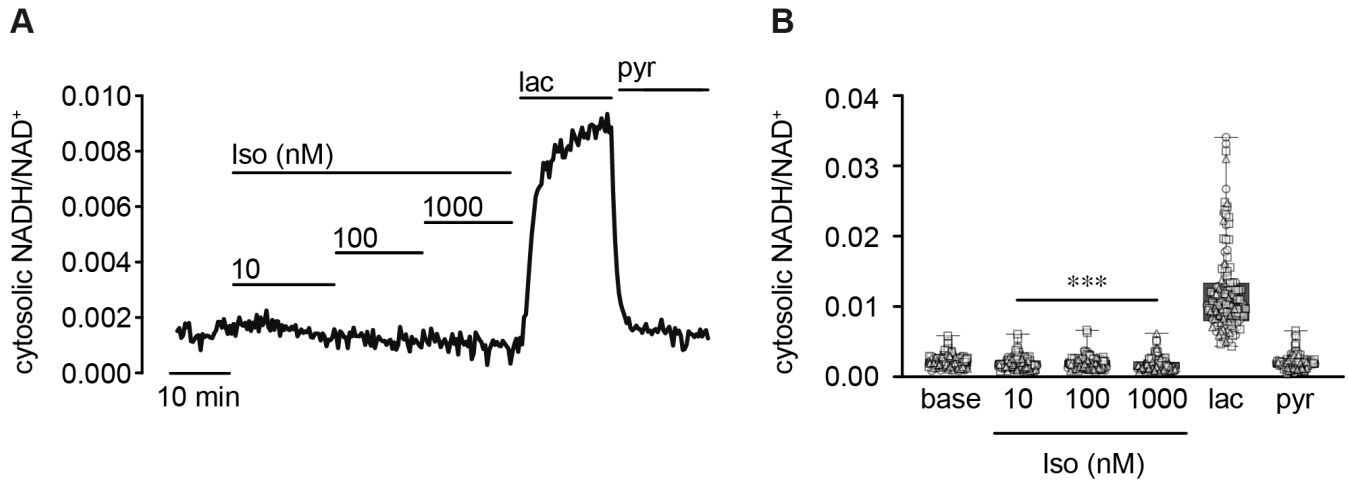

**Supplementary Figure 4: NADH:NAD<sup>+</sup> is not elevated by direct  $\beta$ -adrenergic stimulation.** (A) Representative recordings of cytosolic NADH:NAD<sup>+</sup> in arterial myocyte before and after application of isoproterenol (iso; 10-1000 nM), prior to application of 10 mM lactate and 10 mM pyruvate at the end of the experiment. (B) Box and whiskers plot (line: median, box: 25<sup>th</sup> to 75<sup>th</sup> percentile, whiskers: min and max) summarizing NADH:NAD<sup>+</sup> at baseline (base) and in the presence of iso at concentrations indicated, or in the presence of 10 mM lactate or pyruvate. N = 123 cells, 3 independent experiments (denoted by symbols). \*\*\*p = 0.00001 vs. base (one-way repeated measures ANOVA).

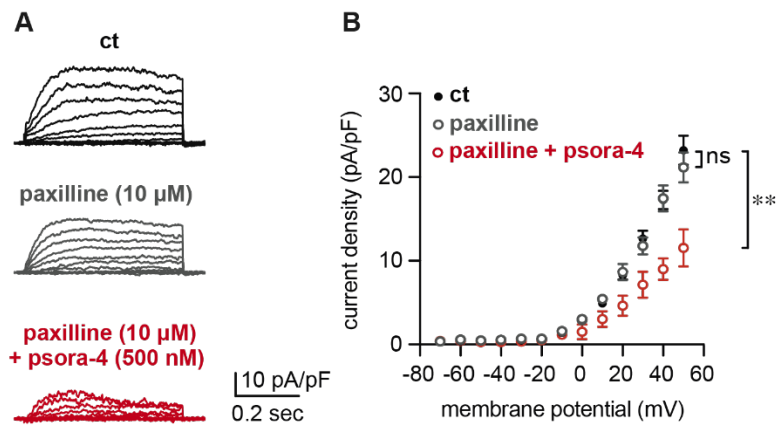

**Supplementary Figure 5: Contribution of Kv1 channels to total outward  $I_K$  in coronary arterial smooth muscle.** (A,B) Representative voltage-clamp  $I_K$  recordings (normalized to cell capacitance, pA/pF, A) and summarized  $I_K$  densities (mean values  $\pm$  SEM, B) in coronary arterial myocytes at depolarizing membrane potentials from -70-50 mV in the absence (ct) and presence of the  $BK_{Ca}$  inhibitor paxilline (10  $\mu$ M), or in the presence of paxilline (10  $\mu$ M) and psora-4 (500 nM).  $n = 7-9$  cells from 4 mice. ns,  $p = 0.9891$ , ct vs. paxilline,  $**p = 0.0006$ , ct vs. paxilline + psora-4 (mixed effects analysis with Dunnett correction).

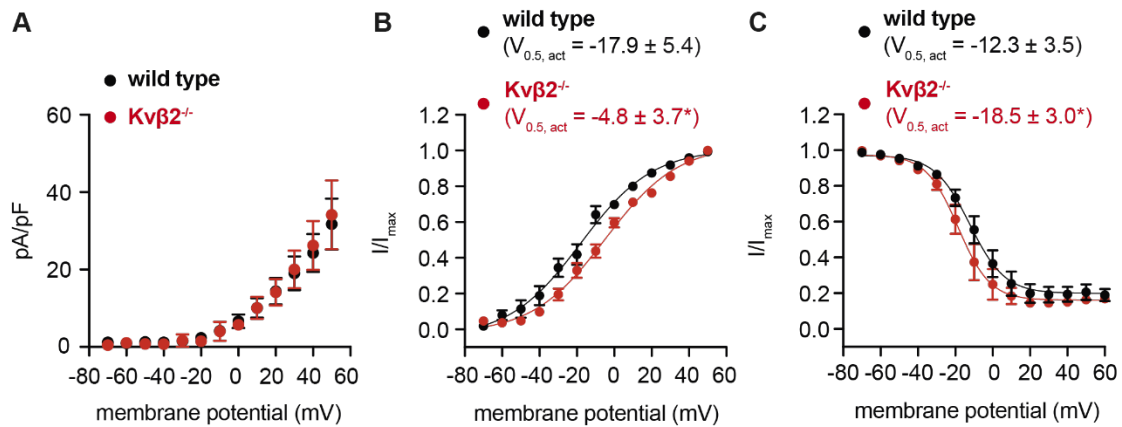

**Supplementary Figure 6: Impact of  $Kv\beta 2$  ablation on whole cell  $I_K$  in coronary arterial smooth muscle.** (A) Summary of total outward  $I_K$  density (mean values  $\pm$  SEM) in freshly isolated coronary arterial myocytes from wild type (129SvEv) and  $Kv\beta 2^{-/-}$  mice.  $n = 7-8$  cells, 4-5 mice for each. (B, C) Plots showing summarized  $I/I_{max}$  (mean values  $\pm$  SEM) across range of membrane potentials from activation and inactivation two-pulse voltage protocols in wild type and  $Kv\beta 2^{-/-}$  mice. Data are fit with Boltzmann function.  $n = 6-12$  cells, 4-5 mice for each. B:  $*p = 0.000013$ ; C:  $*p = 0.008002$ ,  $Kv\beta 2^{-/-}$  vs. wild type (extra sum-of-squares F test).

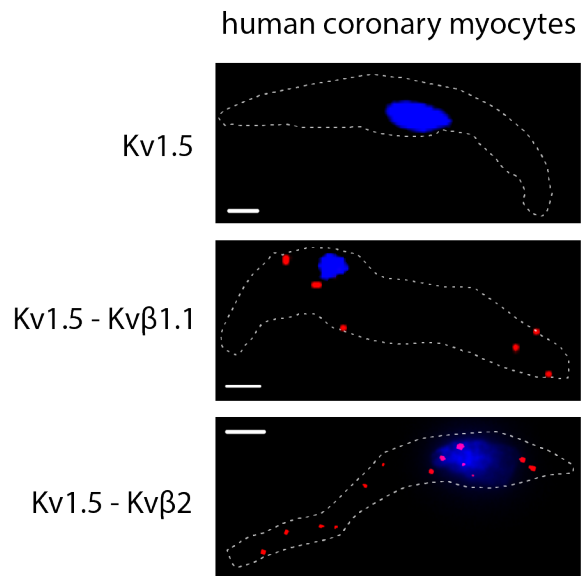

**Supplementary Figure 7: Native Kv1 channels in human coronary arterial myocytes associate with Kv $\beta$  proteins.** Representative fluorescent images showing proximity ligation-positive punctae (red) in isolated human coronary arterial myocytes co-labelled for Kv1.5 and Kv $\beta$ 1.1, and Kv1.5 and Kv $\beta$ 2 proteins. As a control, cells were also labelled for Kv1.5 alone. Images are representative of 4, 10, and 14 cells for cells labelled for Kv1.5 alone, Kv1.5 – Kv $\beta$ 1.1, and Kv1.5 – Kv $\beta$ 2, respectively.



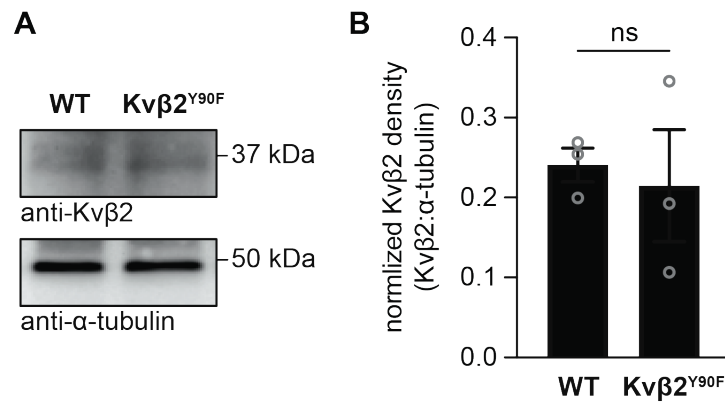

**Supplementary Figure 8: The Y90F mutation in Kvβ2 does not alter the abundance of vascular Kvβ2. (A-B)** Representative blot images showing immunoreactive bands for Kvβ2 and α-tubulin (loading control) (A) and summary (mean values ± SEM) of Kvβ2-associated band densities normalized to α-tubulin (B) in mesenteric artery lysates from wild type and Kvβ2<sup>Y90F</sup> mice. n = 3 each; ns: P>0.05 (two-sided Mann Whitney U test).

**Supplementary Table 1: Available clinical information for human coronary arterial tissue.**

|                                          |                        |
|------------------------------------------|------------------------|
| Sex                                      | Male                   |
| Age                                      | 52 yrs                 |
| Cause of death                           | Cerebrovascular/stroke |
| BMI                                      | 26.4                   |
| <b>Medical history</b>                   |                        |
| Diabetes                                 | No                     |
| Cancer                                   | No                     |
| Coronary artery disease                  | No                     |
| Gastrointestinal disease                 | No                     |
| Chest trauma                             | No                     |
| Cigarette use (>20 pack yr)              | Yes                    |
| Continued cigarette use (prior 6 mo)     | Yes                    |
| Heavy alcohol use (≥2 drinks/day)        | Yes                    |
| I.V. drug use                            | No                     |
| Risk of blood-borne disease transmission | No                     |
| COVID-19                                 | Negative               |

**Supplementary Table 2: Pyridine nucleotide concentrations and redox ratios for whole cell I<sub>Kv</sub> recordings.**

|                         | Oxidized | Reduced |
|-------------------------|----------|---------|
| NAD <sup>+</sup> (μM)   | 1000     | 200     |
| NADH (μM)               | 50       | 1000    |
| NADH:NAD <sup>+</sup>   | 0.05     | 5       |
| NADP <sup>+</sup> (μM)  | 30       | 50      |
| NADPH (μM)              | 100      | 100     |
| NADPH:NADP <sup>+</sup> | 3.33     | 2       |

**Supplementary Table 3: Voltage-sensitivity of Kv activation and inactivation.**

|                              | Wild type   |                              | Kvβ2 <sup>-/-</sup> |                              |
|------------------------------|-------------|------------------------------|---------------------|------------------------------|
|                              | Oxidized    | Reduced                      | Oxidized            | Reduced                      |
| V <sub>0.5, act</sub> (mV)   | -2.5 ± 3.8  | -17.5 ± 3.1<br>(*p = 0.0021) | -11.2 ± 3.0         | 10.9 ± 6.3<br>(*p = 0.0017)  |
| V <sub>0.5, inact</sub> (mV) | -35.7 ± 3.1 | -49.0 ± 1.4<br>(*p = 0.0003) | -51.4 ± 2.9         | -31.4 ± 4.9<br>(*p = 0.0133) |

V<sub>0.5, act/inact</sub>: voltage at 50% of maximum I/I<sub>max</sub>, n = 5-7 cells, 4-5 mice for each, \*p value, reduced vs. oxidized (extra sum-of-squares F test).

**Uncut blot for Supplementary Figure 8**

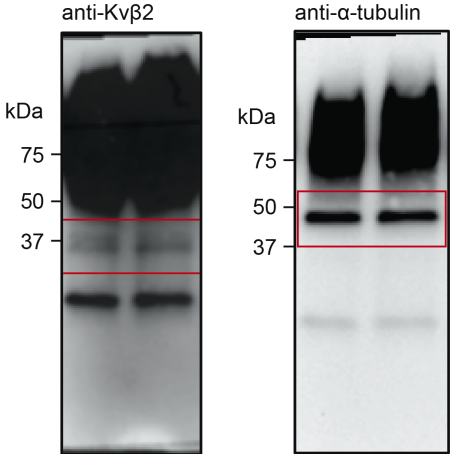

## Supplementary References

1. Hung YP, Albeck JG, Tantama M, Yellen G. Imaging cytosolic NADH-NAD(+) redox state with a genetically encoded fluorescent biosensor. *Cell Metab* **14**, 545-554 (2011).
2. Hung YP, Yellen G. Live-cell imaging of cytosolic NADH-NAD+ redox state using a genetically encoded fluorescent biosensor. *Methods Mol Biol* **1071**, 83-95 (2014).
